# Supplementary material
Source: PubMed Central journal article supplement (PMC2997929)
Supplement: NIHMS232524-supplement-01.pdf [file NIHMS232524-supplement-01.pdf]

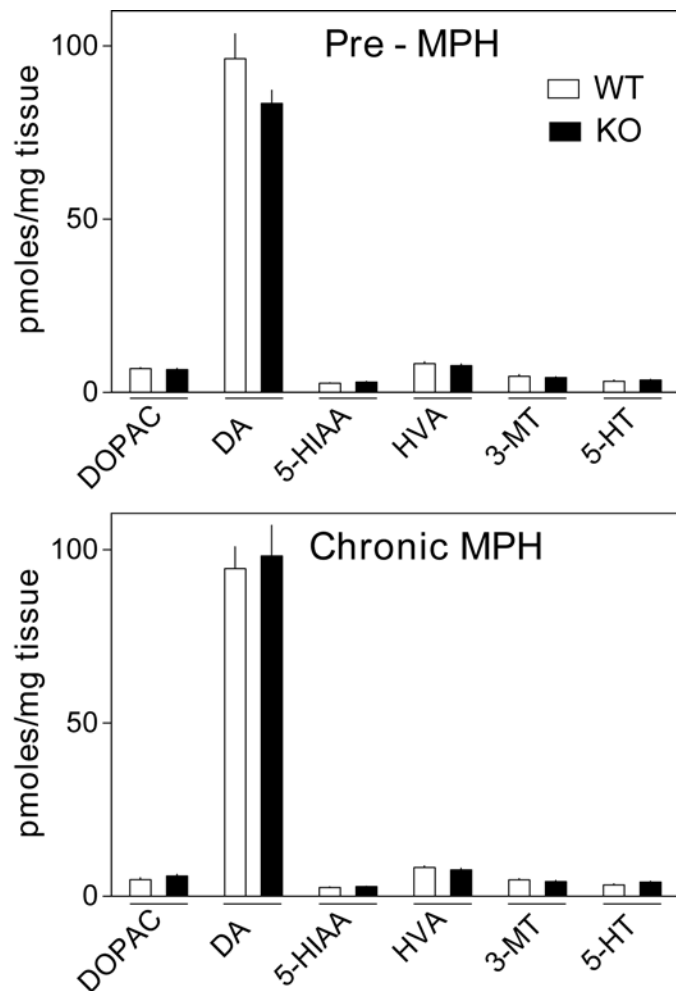

**Figure S1.** Effect of p35 knockout and chronic methylphenidate (MPH) on catecholamine levels in the striatum. Catecholamine levels in control and p35<sup>-/-</sup> mice before and after 5 consecutive intraperitoneal injections of MPH (10 mg/kg). Graphs depict picomoles of 3,4-dihydroxyphenylacetate (DOPAC), dopamine (DA), 5-hydroxyindoleacetate (5-HIAA), homovanillic acid (HVA), 3-methoxytyramine (3-MT), and serotonin (5-HT) normalized to the tissue weight  $\pm$  standard error.
